# Supplementary material for: Improved Autophagic Flux in Escapers from Doxorubicin-Induced Senescence/Polyploidy of Breast Cancer Cells
Source: MDPI journal article supplement (doi:10.3390/ijms21176084), 2020-08-24
Supplement: s1 [file s1]

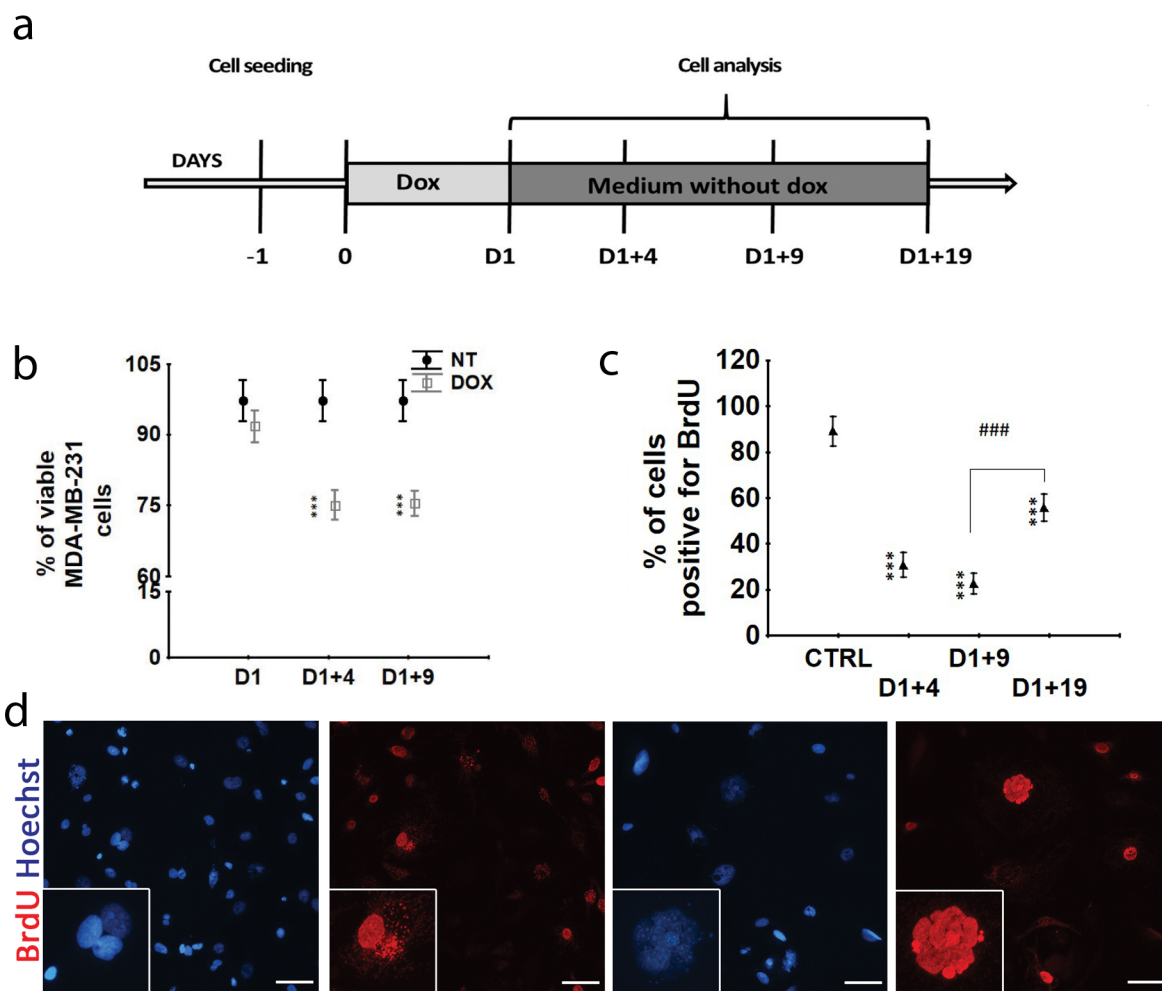

**Figure S1.** Doxorubicin effect on MDA-MB-231 cells. a: Scheme of doxorubicin treatment. b: Viability of cells on consecutive days after doxorubicin treatment. Data obtained by PI and Hoechst 33342 double staining. Each point: mean value+0.95 confidence interval, N=3. c: Percentage of cells positive for BrdU. Data are calculated as the percentage of the total cell population. d: Representative immunofluorescence images of giant nuclei (blue) stained with BrdU (red). Not all nuclei in multinucleated cell are BrdU positive. Scale bars: 20  $\mu$ m. b-c: Statistical significance (in relation to D1 or control):  $p < 0.05$ —\*,  $p < 0.01$ —\*\*,  $p < 0.001$ —\*\*\*, #—between samples.

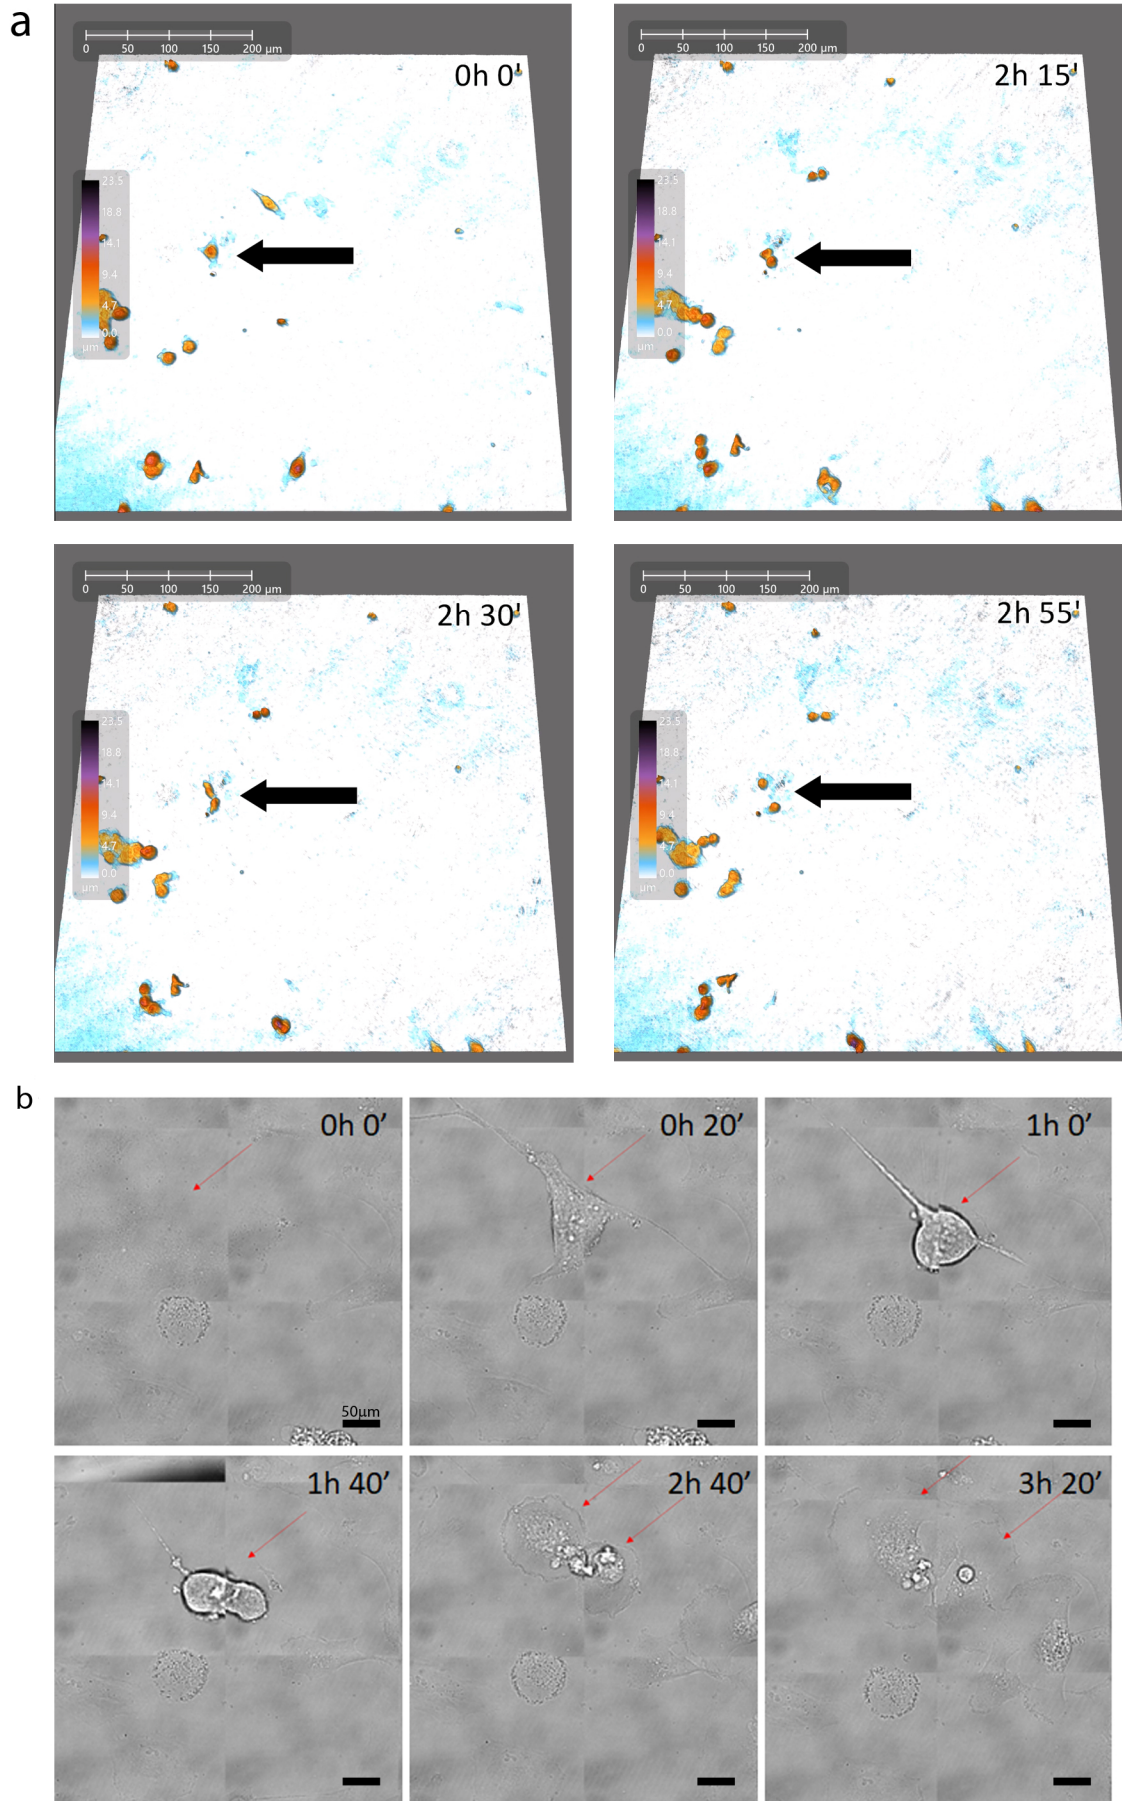

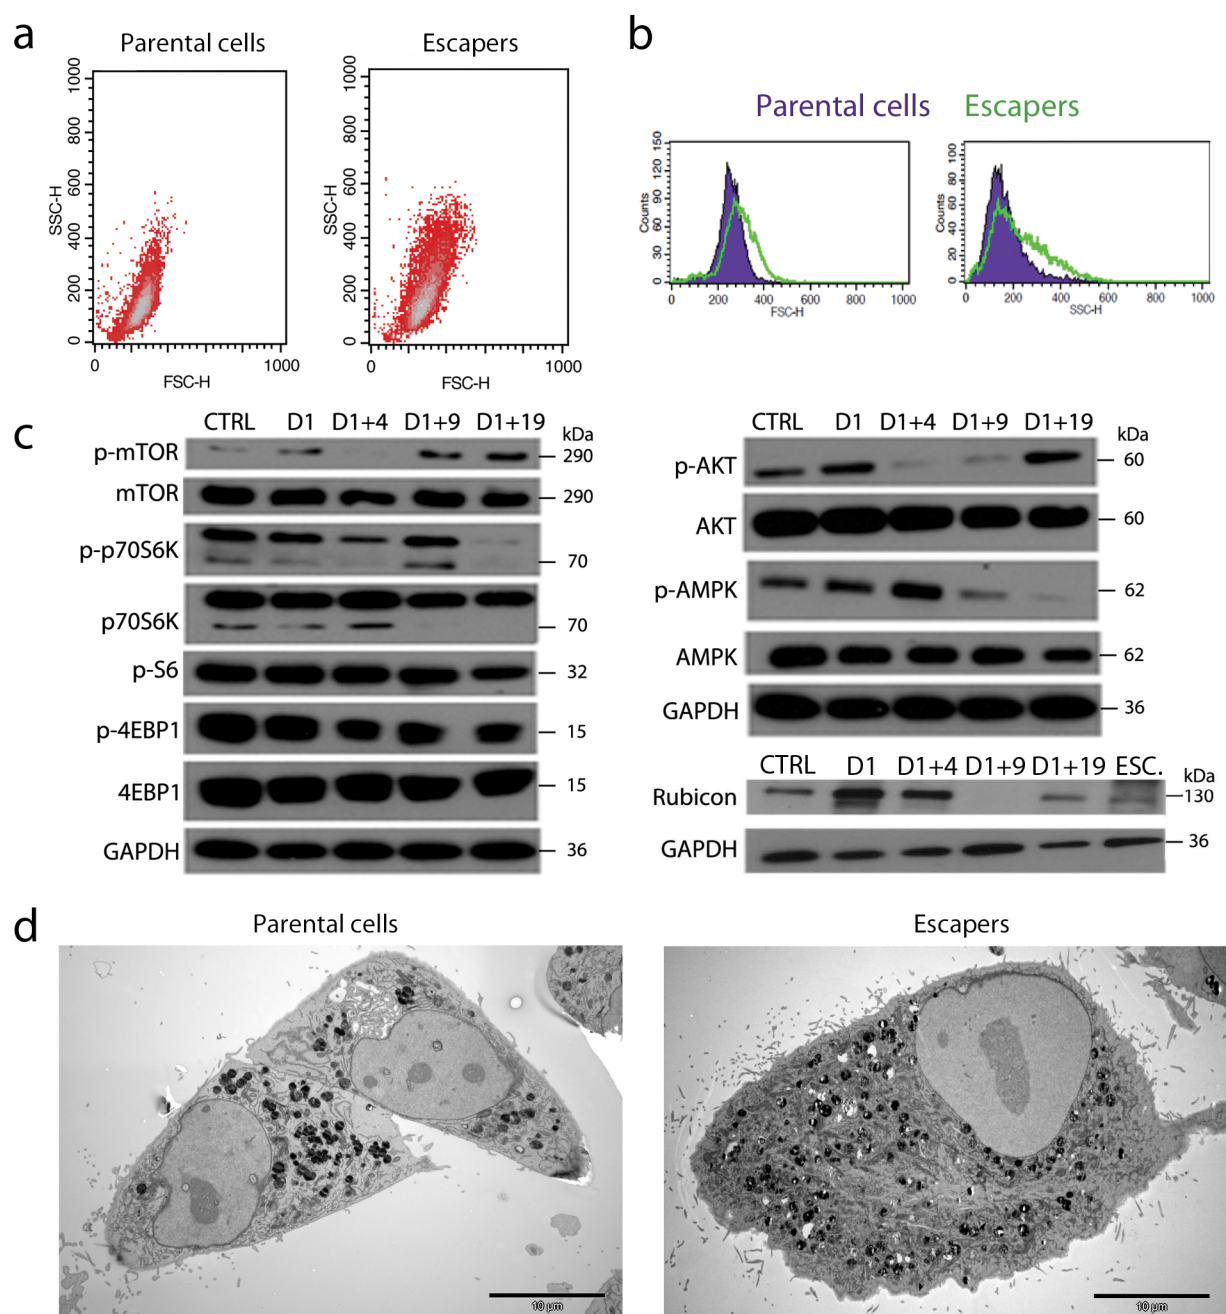

**Figure S3.** Analysis of MDA-MB-231 cells escaping senescence. a: Representative dot plots of size and granularity analysis by flow cytometry. b: Quantitative analysis of size and cell granularity of parental cells and escapers performed using flow cytometry. c: Representative western blots showing protein level of p-mTOR, mTOR, p-p70S6K, p70S6K, p-S6, p-4EBP1, 4EBP1, p-AKT, AKT, p-AMPK, AMPK and Rubicon. d: Representative electron microscopy images showing changes in morphology of cells.

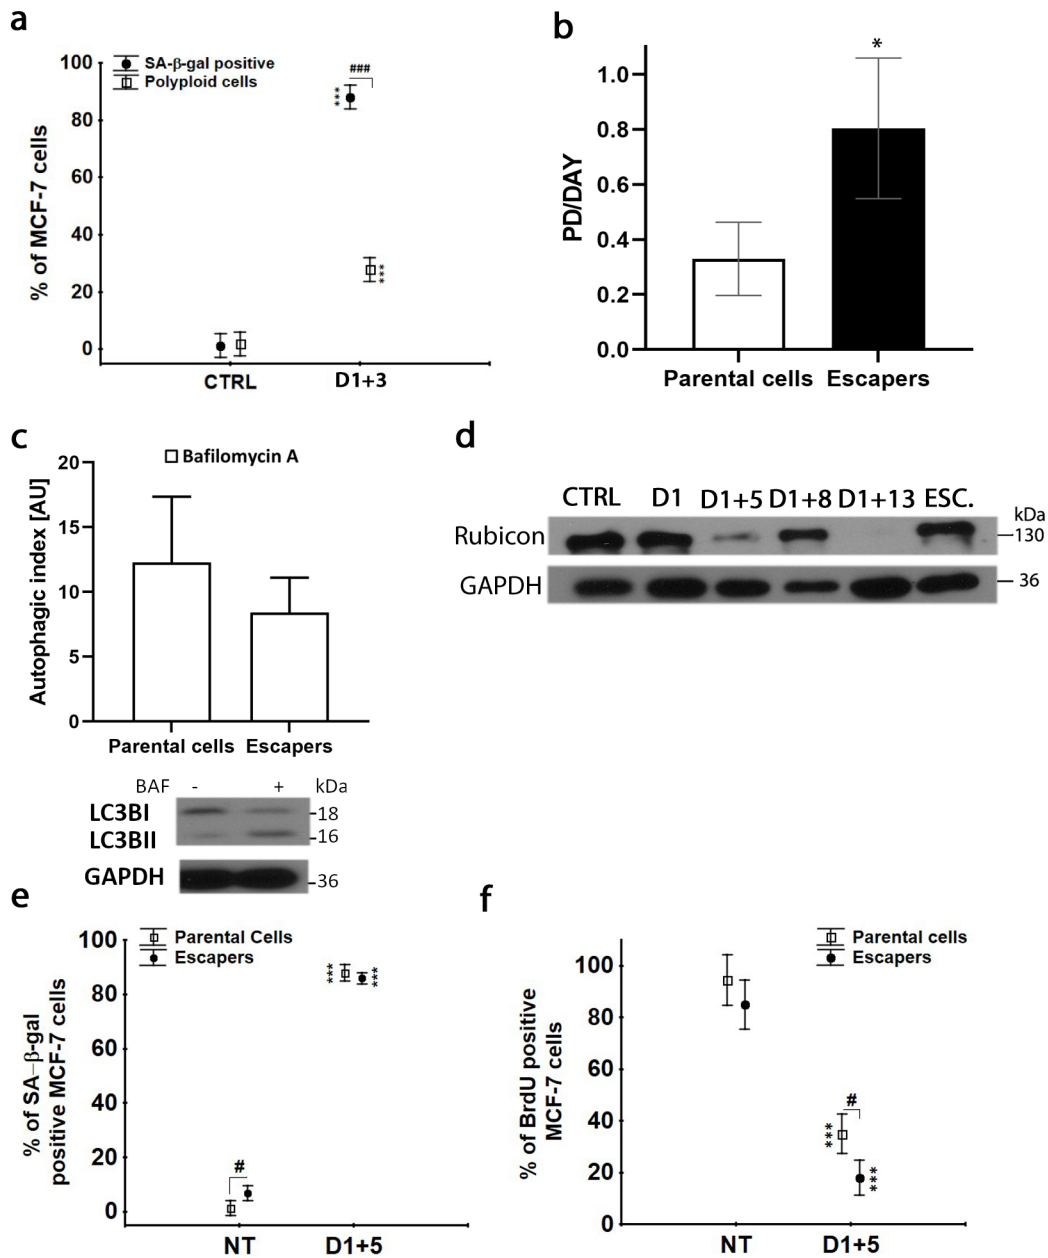

**Figure S4.** Analysis of MCF-7 parental cells and cells escaping senescence. a: Percentage of SA-β-gal-positive cells and polyploid ones. Data are calculated as the percentage of the total cell population, N=3 b: Analysis of population doublings per day. c: Quantitative analysis of autophagic index based on densitometry of LC3B protein level in untreated and Bafilomycin A-treated cells. d: The protein level of Rubicon; representative western blot. e-f: Percentage of SA-β-gal- and BrdU-positive cells. Data are calculated as the percentage of the total cell population. N=4 Statistics: Bars: mean value, error bars: SEM, each point: mean value  $\pm$  0.95 confidence interval. Statistical significance (in relation to non-treated (NT) or arental cells):  $p < 0.05$ -,  $p < 0.01$ -,  $p < 0.001$ -,  $***$ , # - between samples.
